# Supplementary material for: Generation of Volume Meshes by Extrusion from Surface Meshes of Arbitrary Topology.
Source: Royal Society of Chemistry journal article supplement (doi:10.1039/c7nr04610c), 2000-01-01
Supplement: c7nr04610c1.pdf [file c7nr04610c1.pdf]

## Supporting Information

# Simple and Rapid Fabrication of Pencil-on-paper Triboelectric Nanogenerators with Enhanced Electrical Performance

Shin Jang<sup>‡</sup>, Hyounjin Kim<sup>‡</sup> and Je Hoon Oh\*

Department of Mechanical Engineering, Hanyang University, Ansan, 15588, Republic of Korea.

<sup>‡</sup> Authors with equal contribution

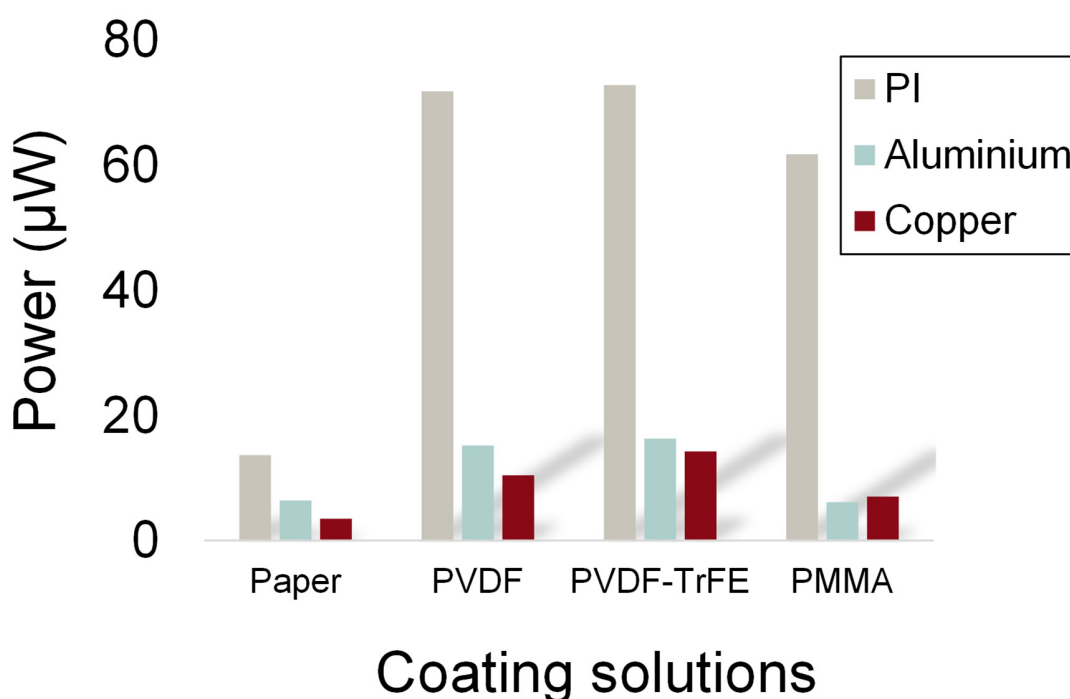

**Figure S1. Output comparison between counter materials (PI, aluminum, and copper) rubbed with coated and uncoated paper.**

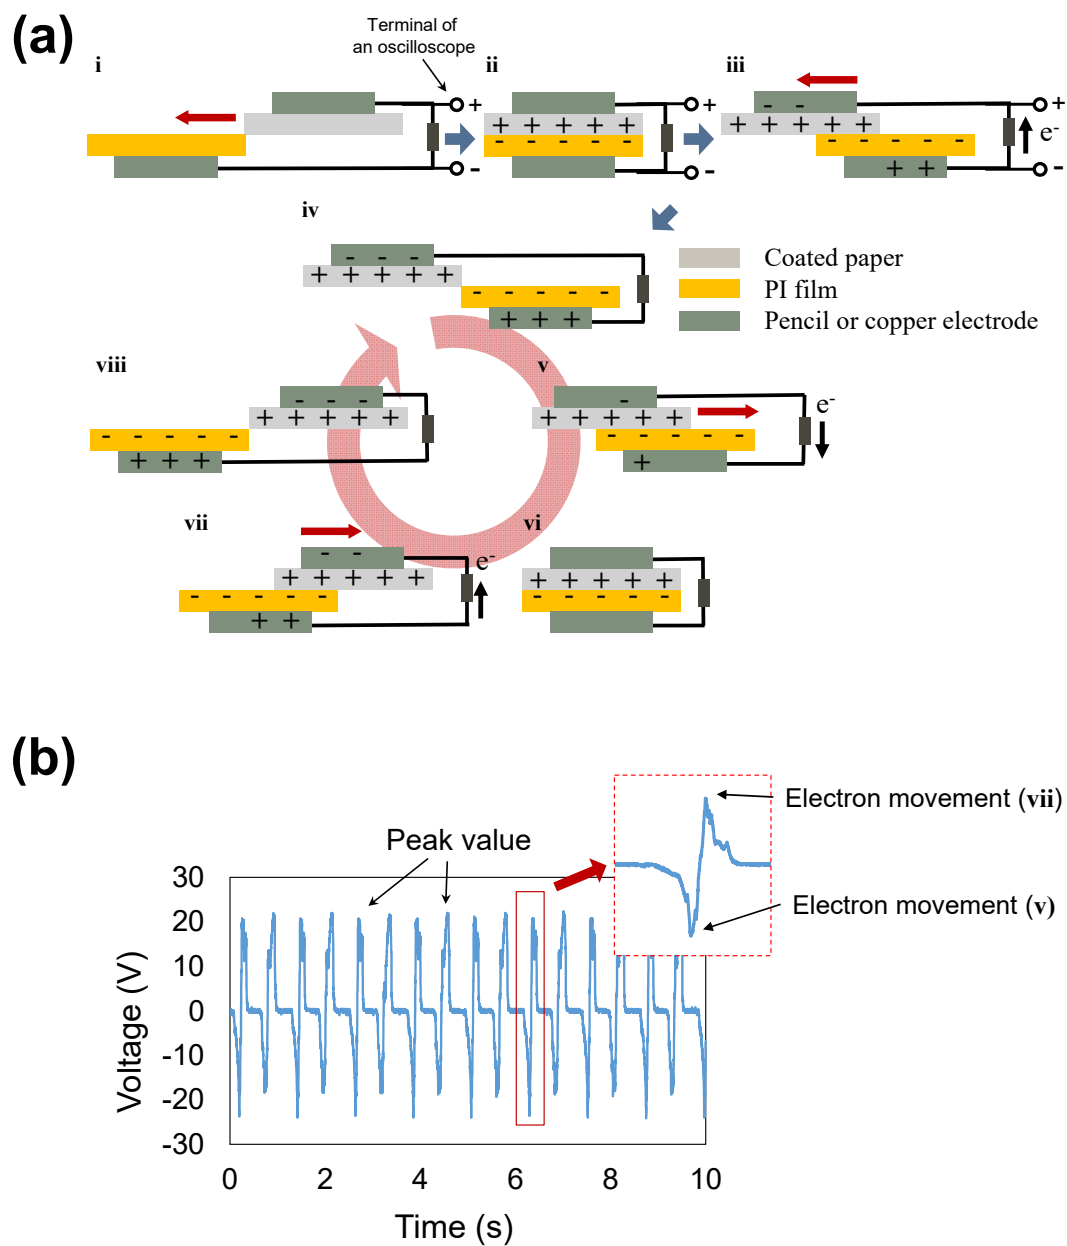

**Figure S2. (a) Working mechanism of the PP-TENG. (b) A performance example of the PP-TENG open-circuit voltage. The inset is magnified for a single sliding process.**

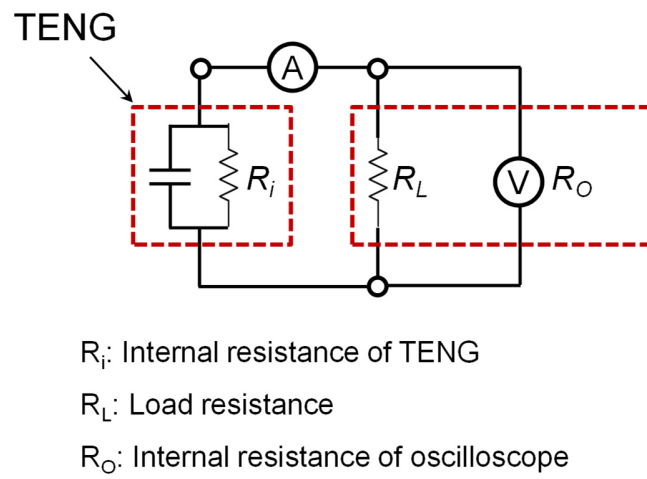

**Figure S3. Electric circuit for measurement of voltage and current.**

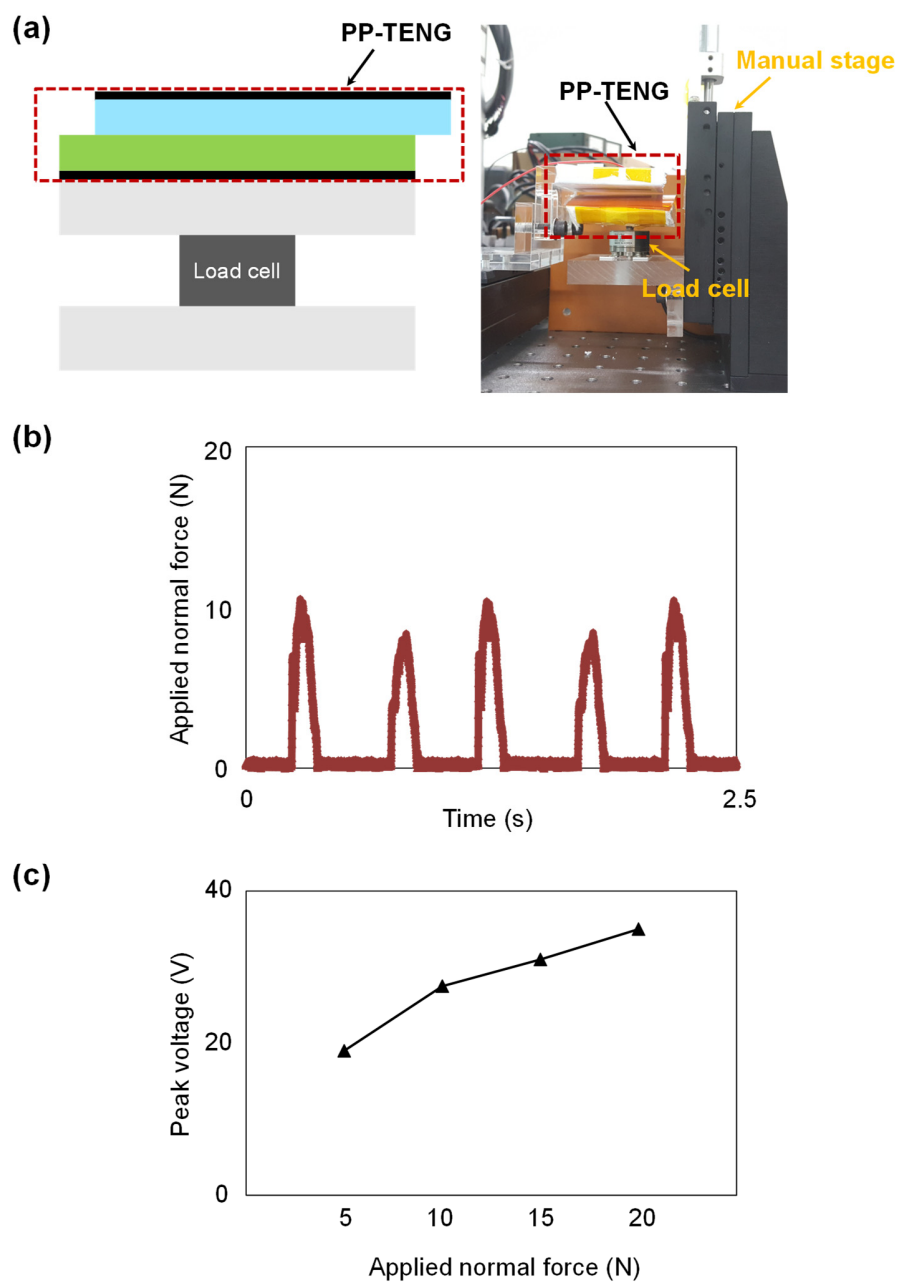

**Figure S4. (a) Schematic and experimental setup for measurement of applied force, (b) applied force as a function of time, and (c) peak voltage of PP-TENG with respect to applied force.**

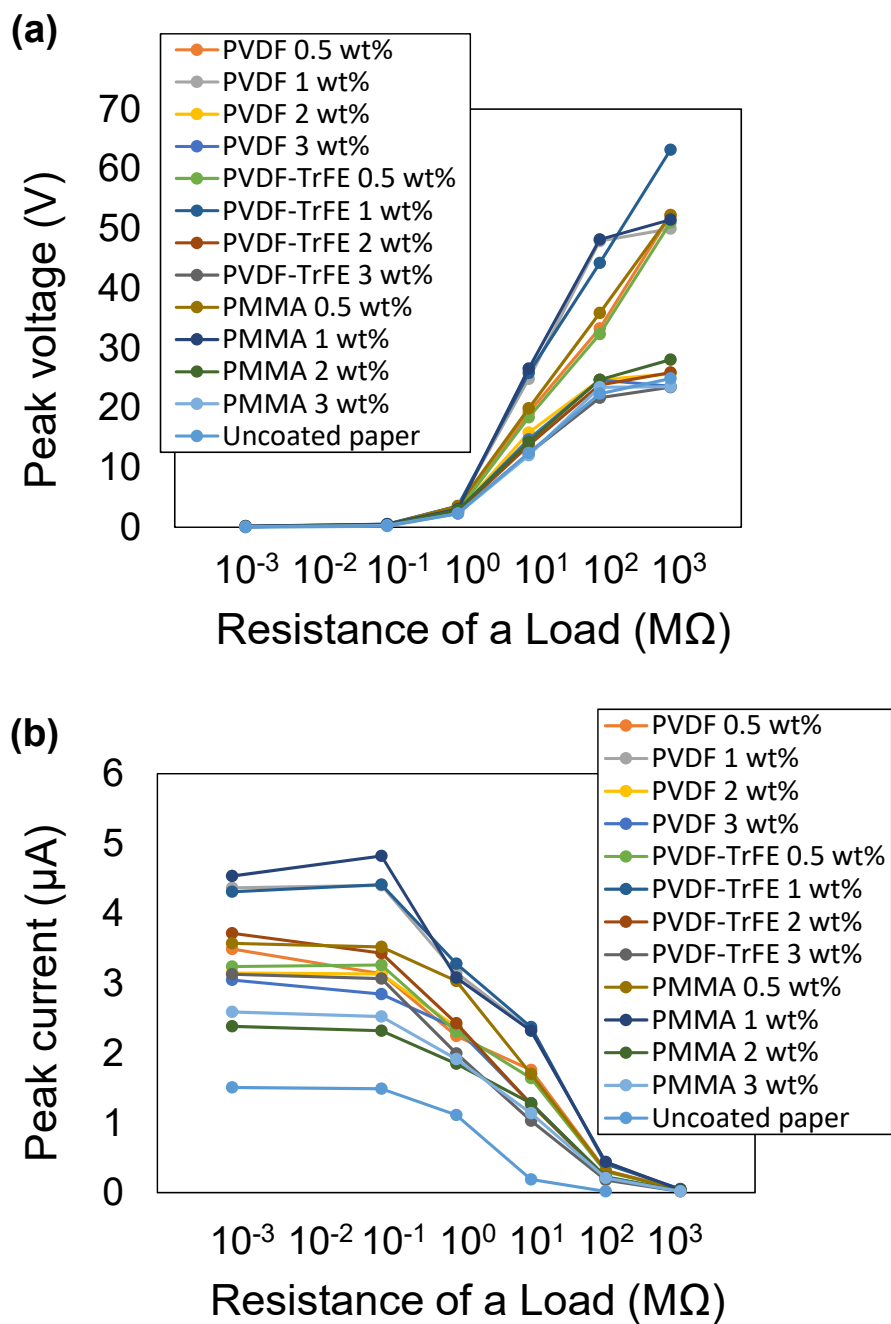

**Figure S5.** Dependence of the PP-TENG output (a) voltage and (b) current on a load resistance while comparing three solutions and concentrations.

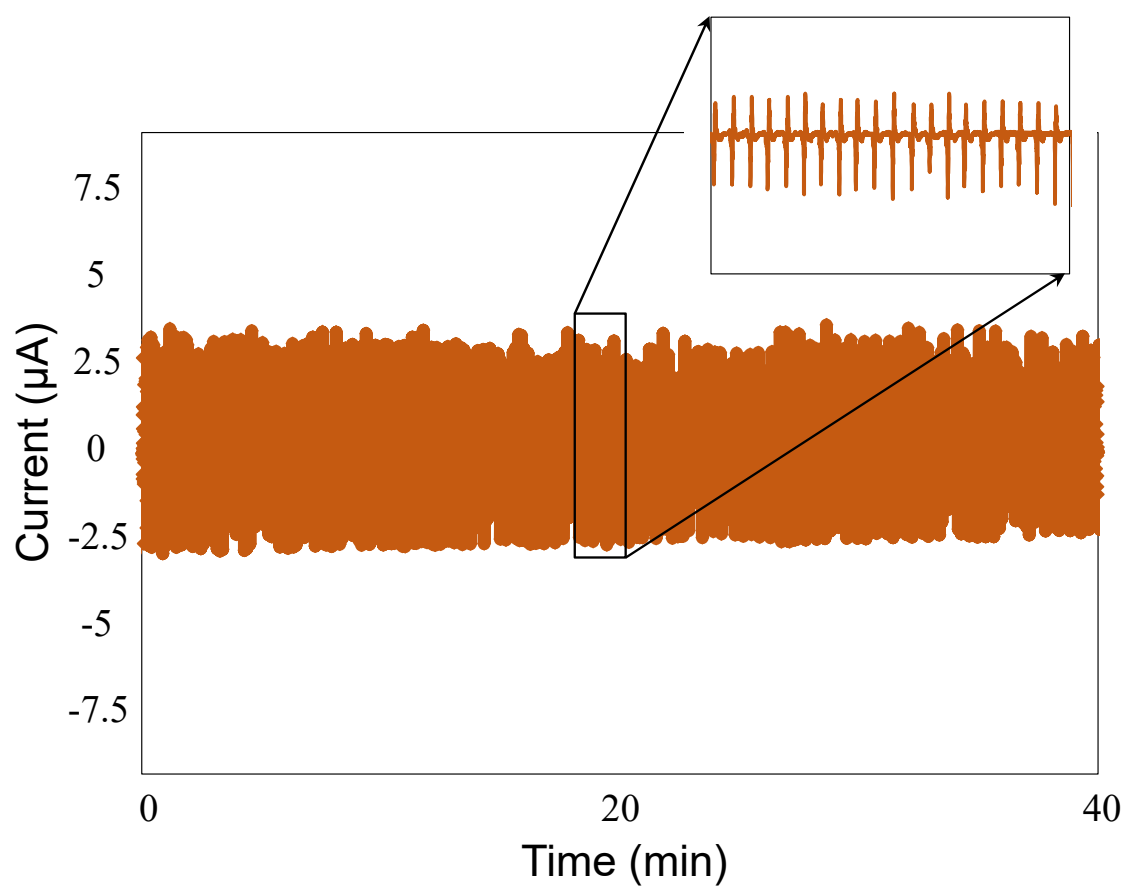

**Figure S6. Cyclic test of the PP-TENG fabricated by using 1 wt% PVDF-TrFE solution.**

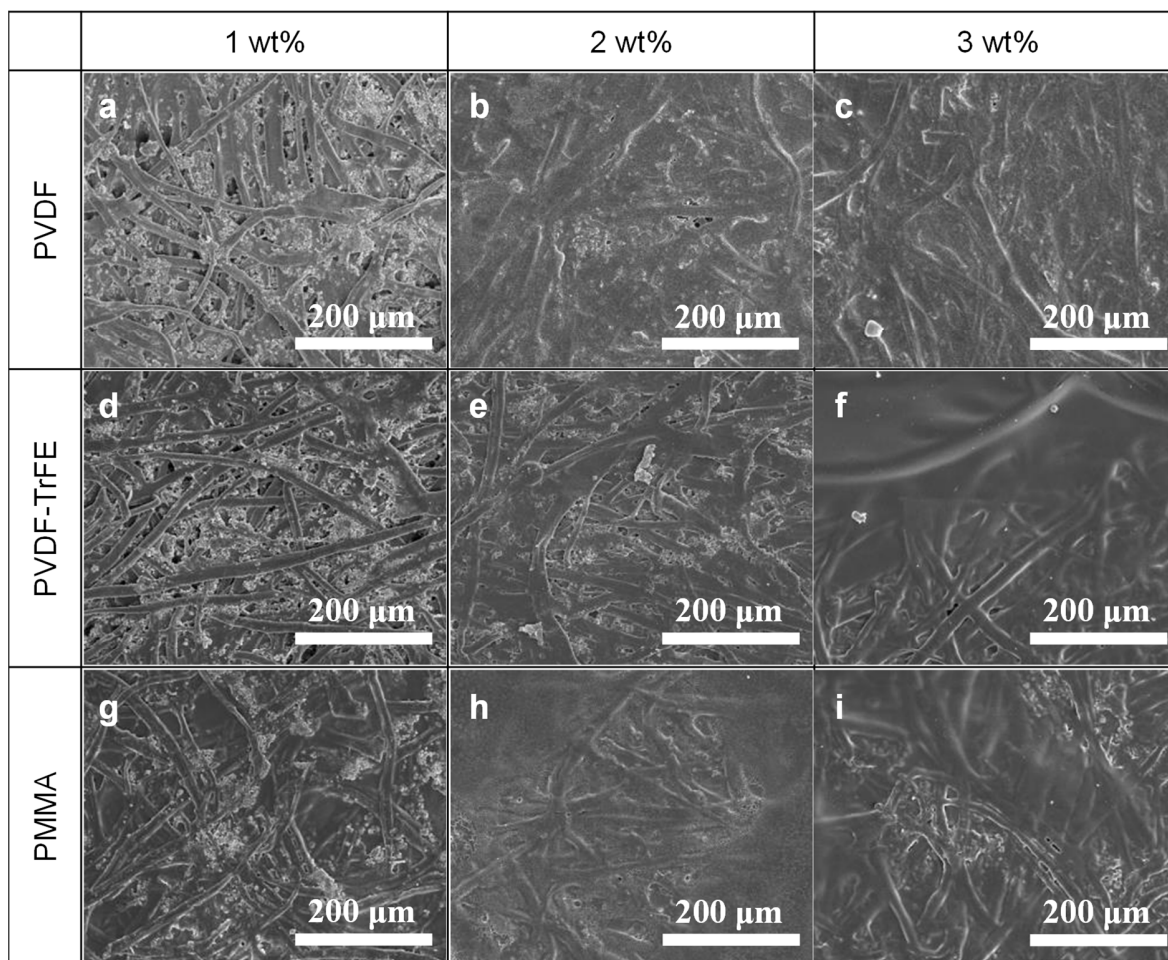

**Figure S7. SEM images of paper coated with PVDF, PVDF-TrFE, and PMMA solutions.**

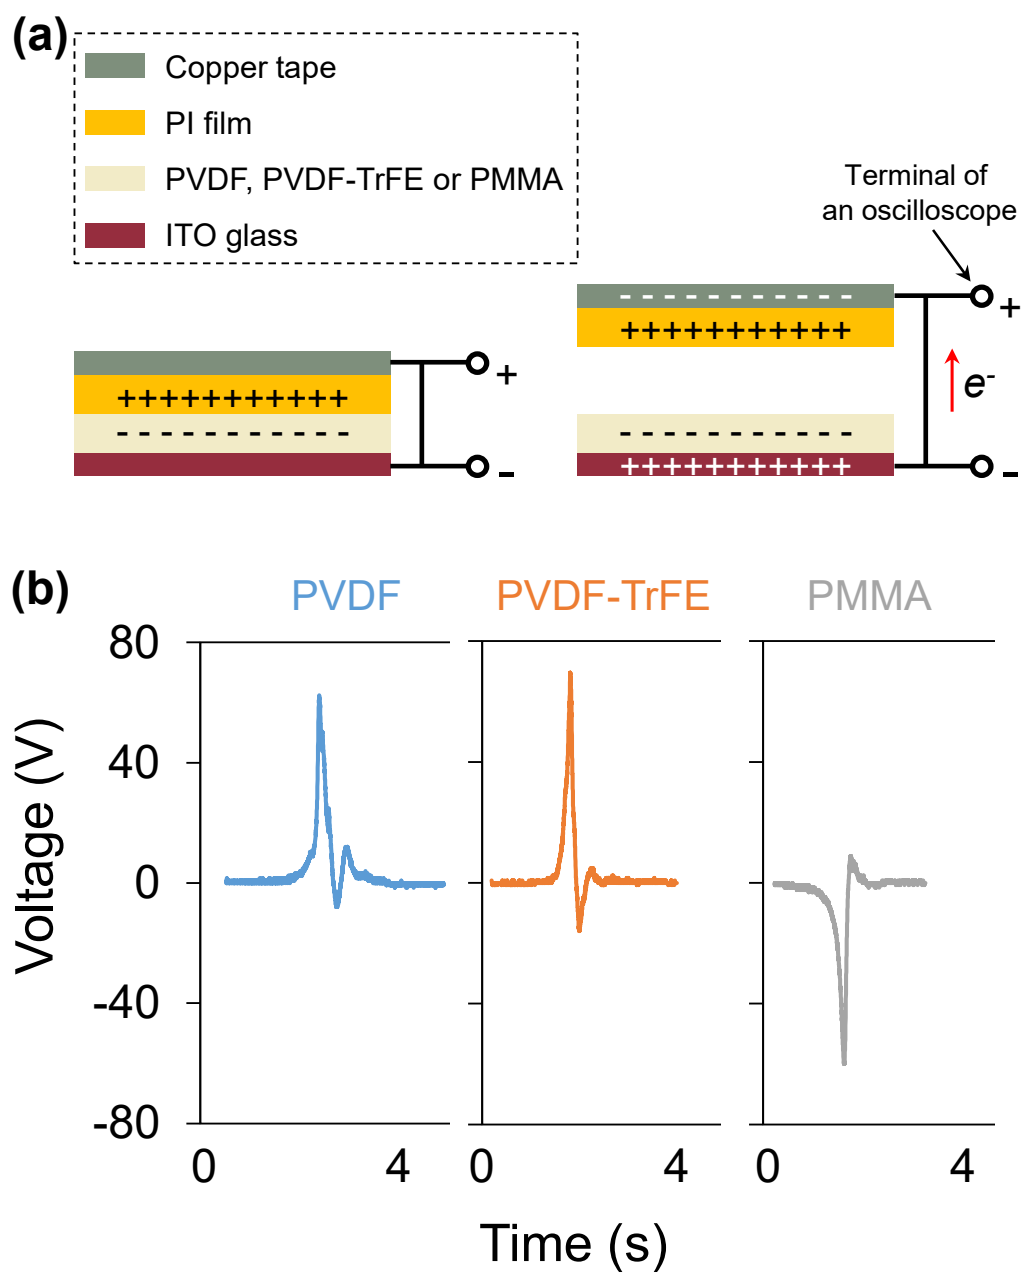

**Figure S8. (a) Schematic image of the repeating contact and separation process for PI and each polymer. (b) Voltage profile during the contact and separation of each polymer with PI.**



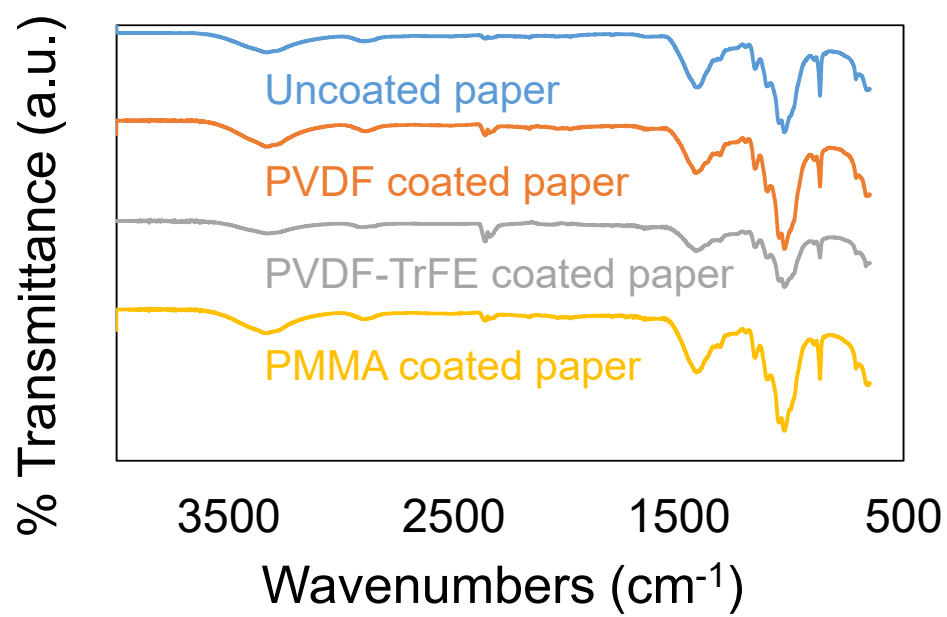

**Figure S9. FTIR spectra of uncoated paper and each solution-coated paper.**

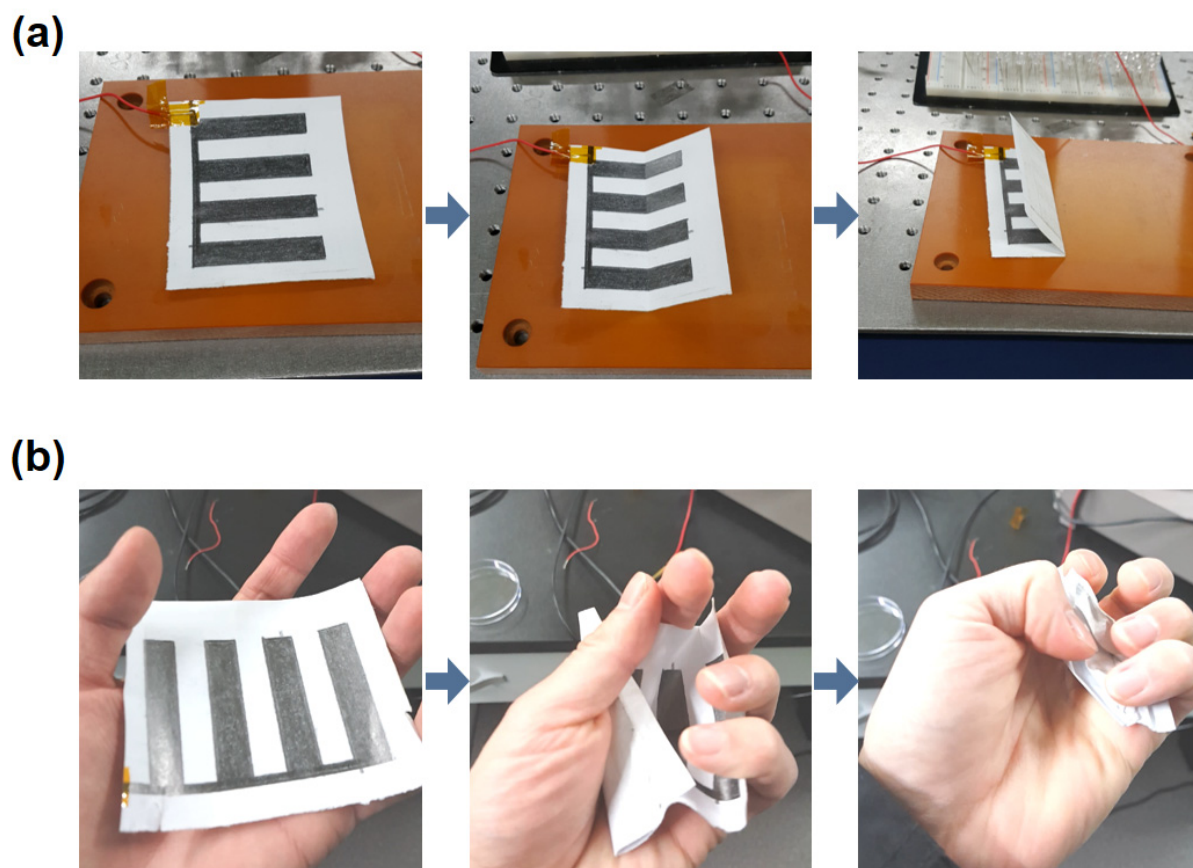

**Figure S10. (a) Folding and (b) crumpling of the papers coated with 1 wt% PVDF-TrFE solution.**

**Table S1. Internal resistance of PP-TENGs.**

|                                                  | PP-TENG<br>without grating | PP-TENG<br>with 4 grating units |
|--------------------------------------------------|----------------------------|---------------------------------|
| Load resistance ( $R_L$ )                        | 10 M $\Omega$              | 10 M $\Omega$                   |
| Internal resistance of<br>oscilloscope ( $R_O$ ) | 10 M $\Omega$              | 10 M $\Omega$                   |
| External load ( $R_e$ )                          | 5 M $\Omega$               | 5 M $\Omega$                    |
| Output current ( $I$ )                           | 2.6 $\mu$ A                | 4.74 $\mu$ A                    |
| Output power ( $P$ )                             | 0.07358 mW                 | 0.267 mW                        |
| Internal resistance of<br>TENG ( $R_i$ )         | 5.88 M $\Omega$            | 6.88 M $\Omega$                 |
